# Supplementary material
Source: HighWire-hosted journal article supplement (https://gh.bmj.com/content/1/3/e000112)
Supplement: inline-supplementary-material-1 [file inline-supplementary-material-1.pdf]

## ONLINE SUPPLEMENTARY APPENDIX

### Webtable 1: Survey facilities random sampling

Delhi, also known as the National Capital Territory (NCT) of Delhi, is divided into total 11 districts namely New Delhi, North Delhi, North West Delhi, West Delhi, South West Delhi, South Delhi, South East Delhi, Central Delhi, North East Delhi, Shahdara, and East Delhi. Out of these 11 districts, we selected a systematic random sample of eight survey districts. In each of the selected districts, a public sector hospital was selected as ‘survey anchor’ (mentioned below).

| <b>List of the survey districts and public-sector ‘survey anchor’ hospital facilities</b> |                         |                                                                   |
|-------------------------------------------------------------------------------------------|-------------------------|-------------------------------------------------------------------|
|                                                                                           | <b>Survey districts</b> | <b>Public-sector survey anchor hospital facilities (location)</b> |
| <b>1</b>                                                                                  | New Delhi               | Ram Manohar Lohia hospital (President's Estate)                   |
| <b>2</b>                                                                                  | East Delhi              | Lal Bahadur Shastri hospital (Khichripur)                         |
| <b>3</b>                                                                                  | North West Delhi        | Dr. Baba Saheb Ambedkar hospital (Rohini)                         |
| <b>4</b>                                                                                  | West Delhi              | Acharya Shree Bhikshu hospital (Moti Nagar)                       |
| <b>5</b>                                                                                  | South Delhi             | Madan Mohan Malviya hospital (Malviya Nagar)                      |
| <b>6</b>                                                                                  | South West Delhi        | Rao Tula Ram Memorial hospital (Jaffarpur Kalan)                  |
| <b>7</b>                                                                                  | Central Delhi           | Govind Ballabh Pant hospital (Jawaharlal Nehru Marg)              |
| <b>8</b>                                                                                  | North East Delhi        | Jag Prवेश Chandra hospital (Shastri park)                         |

Note: The list of all the district-specific public-sector hospitals in Delhi state (sampling pool) was obtained from the Government of Delhi website<sup>1</sup>

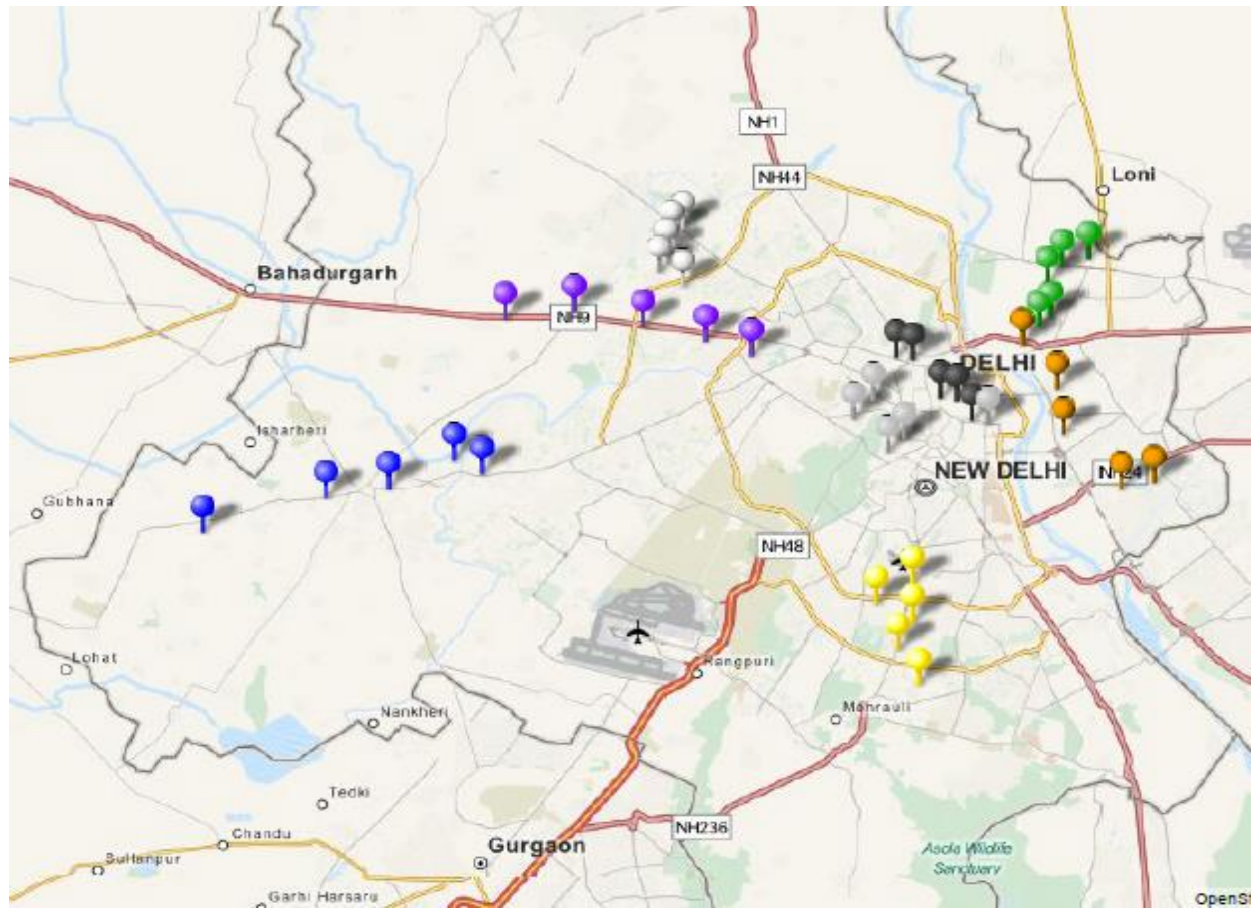

**Figure:** Map indicates the surveyed private-sector retail pharmacies (colored pins) in each of the eight districts. This map is generated based on the GPS coordinates collected at the site of surveyed retail pharmacy. The dark gray outline roughly marks the borders of the Delhi state, India.

**Webtable 2. Public-sector insulin procurement prices (USD)**

| <b>Insulin</b>                              | <b>Procurement price per 100 IU 10 ml vial (USD)</b> | <b>Health department (year)</b>           | <b>Price source</b>                           |
|---------------------------------------------|------------------------------------------------------|-------------------------------------------|-----------------------------------------------|
| Soluble insulin; 40 IU/ml                   | 2.3922                                               | Government of NCT of Delhi 2014           | Colleagues at local university                |
| Soluble insulin; 40 IU/ml                   | 1.8961                                               | Government of NCT of Delhi 2013           | Colleagues at local university                |
| Soluble insulin; 40 IU/ml                   | 2.4927                                               | Municipal Corporation of Delhi (MCD) 2013 | Colleagues at local university                |
| Soluble insulin (Human insulin R); 40 IU/ml | 2.5371                                               | Municipal Corporation of Delhi 2013       | MCD Price booklet                             |
| Soluble insulin (Human insulin R); 40 IU/ml | 2.3298                                               | Government of NCT of Delhi 2013           | Lok Nayak hospital e-tender                   |
| Soluble insulin (Human insulin R) 100 IU/ml | 2.2874                                               | Government of NCT of Delhi 2013           | Lok Nayak hospital e-tender                   |
| Biphasic isophane 30/70 insulin; 40 IU/ml   | 2.3923                                               | Government of NCT of Delhi 2014           | Colleagues at local university                |
| Biphasic isophane 30/70 insulin; 40 IU/ml   | 2.3923                                               | Government of NCT of Delhi 2014           | Colleagues at local university                |
| Biphasic isophane 30/70 insulin; 40 IU/ml   | 2.4927                                               | Municipal Corporation of Delhi 2013       | MCD Price booklet                             |
| Biphasic isophane 30/70 insulin; 40 IU/ml   | 2.3298                                               | Government of NCT of Delhi 2013           | Lok Nayak hospital e-tender                   |
| Biphasic isophane 30/70 insulin; 40 IU/ml   | 3.0257                                               | Government of NCT of Delhi 2013           | Baba Saheb Ambedkar hospital online documents |
| Human insulin 50/50; 40 IU/ml               | 2.0776                                               | Central government (2013)                 | Colleagues at local university                |
| Human insulin 50/50; 100 IU/ml              | 14.8244                                              | Central government (2013)                 | Central government rate contract - 138        |

Public-sector procurement prices refer to the price at which the government or public-sector hospitals procured insulin. We obtained these prices from colleagues at a local university and also performed web searches to find public-sector medicine procurement and rate contract documents uploaded on governments' and hospitals' websites.

| <b>Insulin molecule</b>                 | <b>Strength</b> |
|-----------------------------------------|-----------------|
| Insulin Soluble (Human)                 | 40 IU/ml        |
| Insulin NPH (Human)                     | 40 IU/ml        |
| Insulin Premixed (Human) 30%/70%        | 40 IU/ml        |
| Insulin Premixed (Human) 30%/70%        | 100 IU/ml       |
| Insulin Glargine (Human)                | 100 IU/ml       |
| Insulin Lispro / Apart / Inj. Glulisine | 100 IU/ml       |

| <b>Insulin type and delivery device</b> |           | <b>Place of company's corporate headquarters</b> |                                 |                                           |
|-----------------------------------------|-----------|--------------------------------------------------|---------------------------------|-------------------------------------------|
|                                         |           | <b>Indian</b>                                    | <b>Foreign</b>                  | <b>Combined (both Indian and foreign)</b> |
|                                         |           | <b>Percent availability (n)</b>                  | <b>Percent availability (n)</b> | <b>Percent availability (n)</b>           |
| <b>Human insulin (All molecules)</b>    |           | <b>25.0% (10)</b>                                | <b>90.0% (36)</b>               | <b>90.0% (36/40)</b>                      |
| Vial                                    | 40 IU/ml  | 20.0% (8)                                        | 77.5% (31)                      | 77.5% (31)                                |
|                                         | 100 IU/ml | 0.0% (0)                                         | 15.0% (6)                       | 15.0% (6)                                 |
| Cartridge                               | 40 IU/ml  | 0.0% (0)                                         | 2.5% (1)                        | 2.5% (1)                                  |
|                                         | 100 IU/ml | 7.5% (2)                                         | 25.0% (9)                       | 25.0% (9)                                 |
| Pen                                     | 40 IU/ml  | 0.0% (0)                                         | 0.0% (0)                        | 0.0% (0)                                  |
|                                         | 100 IU/ml | 0.0% (0)                                         | 22.5% (4)                       | 22.5% (4)                                 |
| <b>Analogue insulin (All molecules)</b> |           | <b>5.0% (2/40)</b>                               | <b>32.5% (13/40)</b>            | <b>32.5% (13)</b>                         |
| Vial                                    | 40 IU/ml  | 0.0% (0)                                         | 0.0% (0)                        | 0.0% (0)                                  |
|                                         | 100 IU/ml | 0.0% (0)                                         | 0.0% (0)                        | 0.0% (0)                                  |
| Cartridge                               | 40 IU/ml  | 0.0% (0)                                         | 0.0% (0)                        | 0.0% (0)                                  |
|                                         | 100 IU/ml | 5.0% (2)                                         | 17.5% (7)                       | 17.5% (7)                                 |
| Pen                                     | 40 IU/ml  | 0.0% (0)                                         | 0.0% (0)                        | 0.0% (0)                                  |
|                                         | 100 IU/ml | 0.0% (0)                                         | 22.5% (9)                       | 22.5% (9)                                 |

| <b>Webtable 5: Occurrence of insulin (any brand or company) in the private-sector market in Delhi state, India</b> |                                                                     |                              |                               |                                |                      |
|--------------------------------------------------------------------------------------------------------------------|---------------------------------------------------------------------|------------------------------|-------------------------------|--------------------------------|----------------------|
| <b>Insulin type</b>                                                                                                | <b>Molecule description</b>                                         | <b>Strength</b>              | <b>Brand (company)</b>        | <b>Occurrence</b>              |                      |
| <b>Human insulin</b>                                                                                               | Soluble insulin                                                     | 40 IU/ml*                    | Actrapid HM (Novo Nordisk)    | 40.0% (16)                     |                      |
|                                                                                                                    |                                                                     |                              | Huminsulin NPH (Lilly)        | 7.5% (3)                       |                      |
|                                                                                                                    |                                                                     |                              | Huminsulin R (Lilly)          | 7.5% (3)                       |                      |
|                                                                                                                    |                                                                     |                              | Wosulin R (Wockhardt)         | 5.0% (2)                       |                      |
|                                                                                                                    |                                                                     |                              | Human Actrapid (Novo Nordisk) | 2.5% (1)                       |                      |
|                                                                                                                    |                                                                     |                              | Human Actrapid (Novo Nordisk) | 2.5% (1)                       |                      |
|                                                                                                                    |                                                                     |                              | Lupisulin (Lupin)             | 2.5% (1)                       |                      |
|                                                                                                                    |                                                                     | 100 IU/ml                    | Huminsulin R (Lilly)          | 5.0% (2)                       |                      |
|                                                                                                                    |                                                                     |                              | Actrapid HM (Novo Nordisk)    | 5.0% (2)                       |                      |
|                                                                                                                    |                                                                     |                              | Human Actrapid (Novo Nordisk) | 2.5% (1)                       |                      |
|                                                                                                                    |                                                                     | Isophane insulin             | 40 IU/ml*                     | Human Insultard (Novo Nordisk) | 17.5% (7)            |
|                                                                                                                    |                                                                     |                              |                               | Huminsulin NPH (Lilly)         | 12.5% (5)            |
|                                                                                                                    |                                                                     |                              |                               | Huminsulin N (Lilly)           | 2.5% (1)             |
|                                                                                                                    |                                                                     |                              |                               | 100 IU/ml                      | Huminsulin N (Lilly) |
|                                                                                                                    | Huminsulin NPH (Lilly)                                              |                              |                               |                                | 2.5% (1)             |
|                                                                                                                    | Human Insultard (Novo Nordisk)                                      |                              | 2.5% (1)                      |                                |                      |
|                                                                                                                    | Biphasic isophane insulin: 30% soluble insulin 70% isophane insulin |                              | 40 IU/ml*                     | Human Mixtard (Novo Nordisk)   | 50% (20)             |
|                                                                                                                    |                                                                     |                              |                               | Huminsulin 30/70 (Lilly)       | 40.0% (16)           |
|                                                                                                                    |                                                                     | Insugen 30/70 (Biocon)       |                               | 7.5% (3)                       |                      |
|                                                                                                                    |                                                                     | Lupisulin M30 (Lupin)        |                               | 5.0% (2)                       |                      |
|                                                                                                                    |                                                                     | Wosulin 30/70 (Wockhardt)    |                               | 5.0% (2)                       |                      |
| Insucare M30 (Ranbaxy)                                                                                             |                                                                     | 2.5% (1)                     |                               |                                |                      |
| 100 IU/ml*                                                                                                         |                                                                     | Huminsulin 30/70 (Lilly)     | 22.55 (9)                     |                                |                      |
|                                                                                                                    |                                                                     | Mixtard 30 HM (Novo Nordisk) | 20.0% (8)                     |                                |                      |
|                                                                                                                    |                                                                     | Human Mixtard (Novo Nordisk) | 5.0% (2)                      |                                |                      |
|                                                                                                                    |                                                                     | Mixtard 30 (Novo Nordisk)    | 5.0% (2)                      |                                |                      |
|                                                                                                                    |                                                                     | Lupisulin M30 (Lupin)        | 5.0% (2)                      |                                |                      |

|                                                                                    |                                                                                 |                        |                                   |           |
|------------------------------------------------------------------------------------|---------------------------------------------------------------------------------|------------------------|-----------------------------------|-----------|
|                                                                                    |                                                                                 |                        | Wosulin 30/70 (Wockhardt)         | 5.0% (2)  |
|                                                                                    |                                                                                 |                        | Mixtard 30 Flexpen (Novo Nordisk) | 2.5% (1)  |
|                                                                                    | Biphasic isophane insulin: 50% soluble insulin 50% isophane insulin             | 40 IU/ml               | Human Mixtard 50 (Novo Nordisk)   | 15.0% (6) |
|                                                                                    |                                                                                 |                        | Huminsulin 50/50 (Lilly)          | 7.5% (3)  |
|                                                                                    |                                                                                 |                        | Insugen 50/50 (Biocon)            | 7.5% (3)  |
|                                                                                    |                                                                                 | 100 IU/ml              | Mixtard 50 HM (Novo Nordisk)      | 5.0% (2)  |
|                                                                                    |                                                                                 |                        |                                   |           |
| <b>Analogue insulin</b>                                                            | Insulin aspart                                                                  | 100 IU/ml*             | NovoRapid (Novo Nordisk)          | 12.5% (5) |
|                                                                                    | Biphasic insulin aspart: 30% insulin aspart & 70% protamine crystallized aspart | 100 IU/ml              | Novo Mix 30 (Novo Nordisk)        | 15.0% (6) |
|                                                                                    | Biphasic insulin aspart: 50% insulin aspart & 50% protamine crystallized aspart | 100 IU/ml              | Novo Mix 30 (Novo Nordisk)        | 2.5% (1)  |
|                                                                                    | Insulin glargine                                                                | 100 IU/ml*             | Lantus Solostar (Sanofi)          | 15.0% (6) |
|                                                                                    |                                                                                 |                        | Lantus (Sanofi)                   | 7.5% (3)  |
|                                                                                    |                                                                                 |                        | Basugine (Lupin)                  | 5.0% (2)  |
|                                                                                    | Insulin glulisine                                                               | 100 IU/ml*             | Apidra Solostar (Sanofi)          | 2.5% (1)  |
|                                                                                    |                                                                                 |                        | Apidra (Sanofi)                   | 2.5% (1)  |
|                                                                                    | Insulin lispro                                                                  | 100 IU/ml*             | Humalog (Lilly)                   | 5.0% (2)  |
| Insulin lispro biphasic injection: 25% insulin lispro 75% lispro protamine         | 100 IU/ml                                                                       | Humalog Mix 25 (Lilly) | 12.5% (5)                         |           |
| Insulin lispro biphasic injection: 50% insulin lispro 50% lispro protamine         | 100 IU/ml                                                                       | Humalog Mix 50 (Lilly) | 12.5% (5)                         |           |
| Mean availability of human insulins listed on 2013 Delhi essential medicine list   |                                                                                 |                        |                                   |           |
| Mean availability of analogue insulin listed on 2013 Delhi essential medicine list |                                                                                 |                        |                                   |           |
| * Insulins listed on the 2013 Delhi essential medicines list                       |                                                                                 |                        |                                   |           |

|                         | <b>Combined<br/>(company of any origin)<br/>Median consumer price<br/>(1)</b> | <b>Indian company<br/>Median consumer<br/>price<br/>(2)</b> | <b>Foreign company<br/>Median consumer price<br/>(3)</b> | <b>p-value<br/>(4)</b> |
|-------------------------|-------------------------------------------------------------------------------|-------------------------------------------------------------|----------------------------------------------------------|------------------------|
| <b>Human insulin</b>    |                                                                               |                                                             |                                                          |                        |
| Vial                    | USD 5.6                                                                       | USD 5.6                                                     | USD 6.2                                                  | 0.0840*                |
| Cartridge               | USD 11.2                                                                      | USD 8.1                                                     | USD 11.7                                                 | 0.4467                 |
| Pen                     | USD 18.5                                                                      | #                                                           | USD 18.5                                                 | --                     |
| <b>Analogue insulin</b> |                                                                               |                                                             |                                                          |                        |
| Vial                    | #                                                                             | #                                                           | #                                                        | --                     |
| Cartridge               | USD 24.9                                                                      | USD 26.4                                                    | USD 24.5                                                 | 0.6394                 |
| Pen                     | USD 32.8                                                                      | #                                                           | USD 70.1                                                 |                        |

|                    | <b>Median unit 100 IU<br/>10ml vial cost (overall:<br/>company of any<br/>origin)</b> | <b>Per capita<br/>cost of<br/>monthly<br/>insulin supply<br/>(~ 1.2 vials or<br/>1200 IU)</b> | <b>Ratio (monthly per<br/>capita insulin cost<br/>compared to India's<br/>per capita monthly<br/>health spending)</b> | <b>Number of days per month<br/>an unskilled lowest worker<br/>will have to work to pay for<br/>his or child's (Type 1<br/>diabetes) monthly insulin<br/>supply</b> |
|--------------------|---------------------------------------------------------------------------------------|-----------------------------------------------------------------------------------------------|-----------------------------------------------------------------------------------------------------------------------|---------------------------------------------------------------------------------------------------------------------------------------------------------------------|
| Human Vial         | Rs. 350.0<br>USD 5.6                                                                  | Rs. 420.0<br>USD 6.78                                                                         | 1.15                                                                                                                  | 1.47                                                                                                                                                                |
| Human Cartridge    | Rs. 693.3<br>USD 11.2                                                                 | Rs. 831.96<br>USD 13.43                                                                       | 2.28                                                                                                                  | 2.92                                                                                                                                                                |
| Human Pen          | Rs. 1145.0<br>USD 18.5                                                                | Rs. 1374.00<br>USD 22.17                                                                      | 3.76                                                                                                                  | 4.82                                                                                                                                                                |
| Analogue Vial      | #                                                                                     |                                                                                               |                                                                                                                       |                                                                                                                                                                     |
| Analogue Cartridge | Rs. 1546.7<br>USD 24.96                                                               | Rs. 1856.04<br>USD 29.95                                                                      | 5.08                                                                                                                  | 6.51                                                                                                                                                                |
| Analogue Pen       | Rs. 2033.0<br>USD 32.8                                                                | Rs. 2439.6<br>USD 39.37                                                                       | 6.68                                                                                                                  | 8.56                                                                                                                                                                |

The prices (collected in Indian Rupees) of all survey insulin products with variable pack sizes (milliliters) and strength were adjusted to 10 ml 100 IU/ml pack for purpose of comparisons. Per capita monthly insulin need is calculated based on WHO daily defined dose of 40 IU/day. The wage of a lowest paid unskilled worker during the time of survey was Rs. 8554 per month (i.e. daily wage of Rs. 285.1).<sup>2</sup> The 2013 annual per capita health expenditure (both public and private sectors combined) was USD 69.0 (Rs. 4,275.9) i.e. monthly USD 5.74 (Rs. 365.33).<sup>3</sup>

**Webtable 8: Price components of the internationally manufactured (imported) insulin products found in the private-sector market in Delhi state**

| Insulin molecule<br>[Number of products found in facility survey] | Product brand<br>(company)      | Country of Manufacture | Package form | Percentage mark-ups                |                                      |                                   |
|-------------------------------------------------------------------|---------------------------------|------------------------|--------------|------------------------------------|--------------------------------------|-----------------------------------|
|                                                                   |                                 |                        |              | Import to wholesale price (per ml) | Wholesale to consumer price (per ml) | Import to consumer price (per ml) |
| <b>Human insulin</b>                                              |                                 |                        |              |                                    |                                      |                                   |
| Soluble insulin<br>100 IU/ml [3]                                  | Huminsulin R® (Lilly)           | Egypt                  | Vial         | 16.72%                             | 18.76%                               | 38.62%                            |
|                                                                   | Human Actrapid® (Novo Nordisk)  | Brazil                 | Cartridge    | 26.95%                             | 19.34%                               | 51.50%                            |
|                                                                   | Human Actrapid® (Novo Nordisk)  | Denmark                | Pen          | **                                 | 16.57%                               | **                                |
| Isophane insulin<br>100 IU/ml [3]                                 | Huminsulin® N (Lilly)           | Egypt                  | Vial         | 14.90%                             | 18.74%                               | 36.43%                            |
|                                                                   | Huminsulin® NPH (Eli Lilly)     | France                 | Cartridge    | 16.73%                             | 17.64%                               | 37.33%                            |
|                                                                   | Human Insultard® (Novo Nordisk) | Brazil                 | Cartridge    | 14.46%                             | 24.87%                               | 42.93%                            |
| Biphasic isophane insulin:<br>30% sol 70% isophane 100 IU/ml [5]  | Human Mixtard® (Novo Nordisk)   | Denmark                | Vial         | **                                 | 22.52%                               | **                                |
|                                                                   | Huminsulin® 30/70 (Lilly)       | Egypt                  | Vial         | 11.18%                             | 24.96%                               | 38.94%                            |
|                                                                   | Huminsulin® 30/70 (Eli Lilly)   | France                 | Cartridge    | 16.21%                             | 24.43%                               | 44.61%                            |
|                                                                   | Mixtard® 30 HM (Novo Nordisk)   | Brazil                 | Cartridge    | 33.41%                             | 16.06%                               | 54.83%                            |
|                                                                   | Mixtard® 30 HM (Novo Nordisk)   | Denmark                | Pen          | 27.23%                             | 24.55%                               | 58.46%                            |
| Biphasic isophane insulin:<br>50% sol 50%                         | Mixtard® 50 HM (Novo Nordisk)   | Denmark                | Cartridge    | 26.46%                             | 19.34%                               | 50.92%                            |



|                                                                                               |                                   |                  |           |        |        |         |  |
|-----------------------------------------------------------------------------------------------|-----------------------------------|------------------|-----------|--------|--------|---------|--|
| isophane 100 IU/ml [1]                                                                        |                                   |                  |           |        |        |         |  |
| <b>Analogue insulin</b>                                                                       |                                   |                  |           |        |        |         |  |
| Insulin Aspart 100 IU/ml [1]                                                                  | Novo Rapid® (Novo Nordisk)        | Denmark          | Pen       | 20.71% | 24.87% | 50.73%  |  |
| Biphasic insulin aspart: Insulin Aspart & Protamine crystallized Aspart 30/70; 100 IU/ml [1]  | Novo Mix® 30 (Novo Nordisk)       | Brazil           | Cartridge | 25.84% | 13.98% | 43.43%  |  |
|                                                                                               | Novo Mix® 30 (Novo Nordisk)       | Brazil & Denmark | Pen       | 8.44%  | 24.83% | 35.37%  |  |
| Biphasic insulin aspart: Insulin Aspart & Protamine crystallized Aspart 50/50; 100 IU/ml. [1] | Novo Mix® 50 (Novo Nordisk)       | Denmark          | Pen       | 15.98% | 31.0%  | 51.99%  |  |
| Insulin glargine 100 IU/ml [3]                                                                | Lantus® (Sanofi-Aventis)          | Germany          | Cartridge | 11.47% | 29.40% | 44.24%  |  |
|                                                                                               | Basugine® (Lupin)                 | China            | Cartridge | 74.68% | 30.85% | 128.57% |  |
|                                                                                               | Lantus® Solostar (Sanofi-Aventis) | Germany          | Pen       | **     | 82.48% | **      |  |
| Insulin glulisine 100 IU/ml [2]                                                               | Apidra® (Sanofi-Aventis)          | Germany          | Cartridge | ##     | ##     | 41.26%  |  |
|                                                                                               | Apidra Solostar® (Sanofi-Aventis) | Germany          | Pen       | ##     | ##     | 43.73%  |  |
| Insulin lispro 100 IU/ml [1]                                                                  | Humalog® (Eli Lilly®)             | Italy            | Cartridge | 5.31%  | 19.07% | 25.40%  |  |
| Insulin Lispro Biphasic injection: 25% insulin lispro                                         | Humalog® Mix (Eli Lilly)          | Italy & USA      | Cartridge | 6.20%  | 24.46% | 32.17%  |  |
|                                                                                               | Humalog® Mix 25 (Eli Lilly)       | USA              | Pen       | **     | 19.20% | **      |  |

|                                                                                                                                                                                                                                   |                             |              |           |                                          |                                         |                                        |  |
|-----------------------------------------------------------------------------------------------------------------------------------------------------------------------------------------------------------------------------------|-----------------------------|--------------|-----------|------------------------------------------|-----------------------------------------|----------------------------------------|--|
| 75% lispro protamine; 100 IU/ml [2]                                                                                                                                                                                               |                             |              |           |                                          |                                         |                                        |  |
| Insulin Lispro Biphasic injection: 50% insulin lispro 50% lispro protamine; 100 IU/ml [2]                                                                                                                                         | Humalog® Mix 50 (Eli Lilly) | France & USA | Cartridge | 6.22%                                    | 22.04%                                  | 29.63%                                 |  |
|                                                                                                                                                                                                                                   | Humalog® Mix 50 (Eli Lilly) | USA          | Pen       | 5.23%                                    | 19.20%                                  | 25.43%                                 |  |
| <b>Median (Min; Max) percentage mark up</b>                                                                                                                                                                                       | <b>Human insulin</b>        |              |           | <b>16.77%</b><br><b>(11.18%; 33.41%)</b> | <b>19.34%</b><br><b>(16.06%; 25.0%)</b> | <b>43.77%</b><br><b>(36.43; 58.46)</b> |  |
|                                                                                                                                                                                                                                   | <b>Analogue insulin</b>     |              |           | 9.96 (5.29; 74.68)                       | 24.65 (13.98; 82.48)                    | 38.32 (16.49; 128.56)                  |  |
| ** Import price not available; ## Available price data point was higher than the succeeding supply chain price point. In other words, either import or wholesale price was higher than wholesale or consumer price, respectively. |                             |              |           |                                          |                                         |                                        |  |

## References:

1. Health and family Welfare, Government of NCT of Delhi. [District-wise list of public-sector hospitals] Accessed on 6 June, 2016. [http://www.delhi.gov.in/wps/wcm/connect/DoIT\\_Health/health/our+services/map+info+delhi+govt.+hospitals](http://www.delhi.gov.in/wps/wcm/connect/DoIT_Health/health/our+services/map+info+delhi+govt.+hospitals)
2. Minimum wages revised in Delhi w.e.f. 01st Apr 2014. Labor Law Reporter. Accessed on 6 June, 2016. <http://www.labourlawreporter.com/1915>
3. Data: Health expenditure per capita (current US\$). World Bank. Accessed on 6 June, 2016. <http://data.worldbank.org/indicator/SH.XPD.PCAP>
